# Supplementary material
Source: PubMed Central journal article supplement (PMC3583506)
Supplement: supp_112.201475_JPET201475_fig_1.pdf [file supp_112.201475_JPET201475_fig_1.pdf]

## Mechanisms Limiting Distribution of the BRAF<sup>V600E</sup> Inhibitor Dabrafenib to the Brain: Implications for the Treatment of Melanoma Brain Metastases

Rajendar K Mittapalli, Shruthi Vaidhyanathan, Arkadiusz Z. Dudek, and William F. Elmquist

Journal of Pharmacology and Experimental Therapeutics

### Supplemental Figure 1:

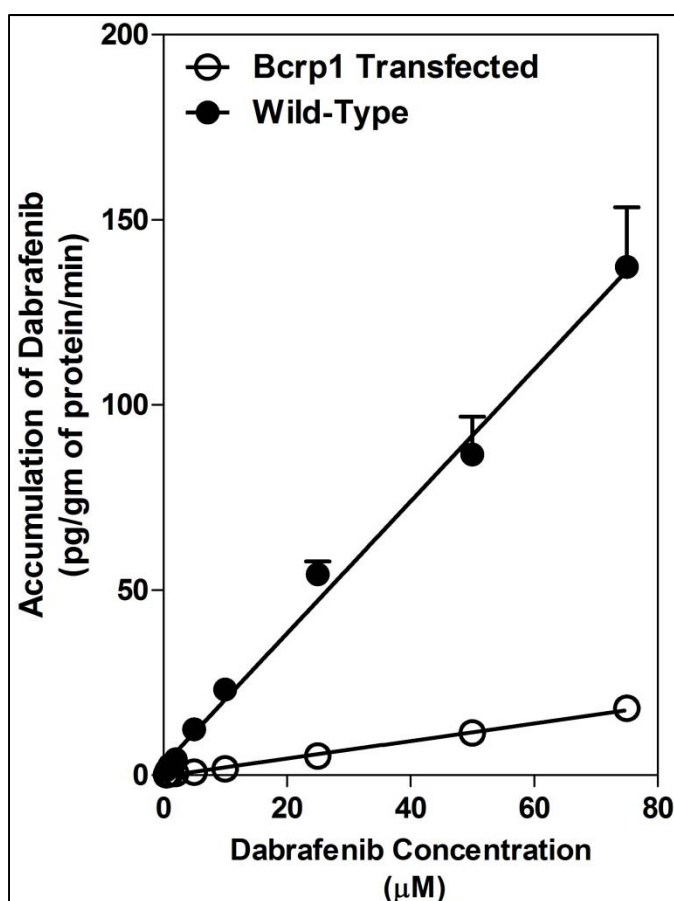

**Figure Legend:** Accumulation of different concentrations (0.5 to 75 µM) of dabrafenib in MDCKII- wild type and Bcrp1 transfected cell lines. The data show a linear correlation between concentration and cellular accumulation indicating no saturation of these active efflux transporters. Data represent Mean ± SD; n= 3 for all data sets.
