# Supplementary material
Source: PubMed Central journal article supplement (PMC3583506)
Supplement: supp_112.201475_JPET201475_fig_2.pdf [file supp_112.201475_JPET201475_fig_2.pdf]

## Mechanisms Limiting Distribution of the BRAF<sup>V600E</sup> Inhibitor Dabrafenib to the Brain: Implications for the Treatment of Melanoma Brain Metastases

Rajendar K Mittapalli, Shruthi Vaidhyanathan, Arkadiusz Z. Dudek, and William F. Elmquist

Journal of Pharmacology and Experimental Therapeutics

### Supplemental Figure 2:

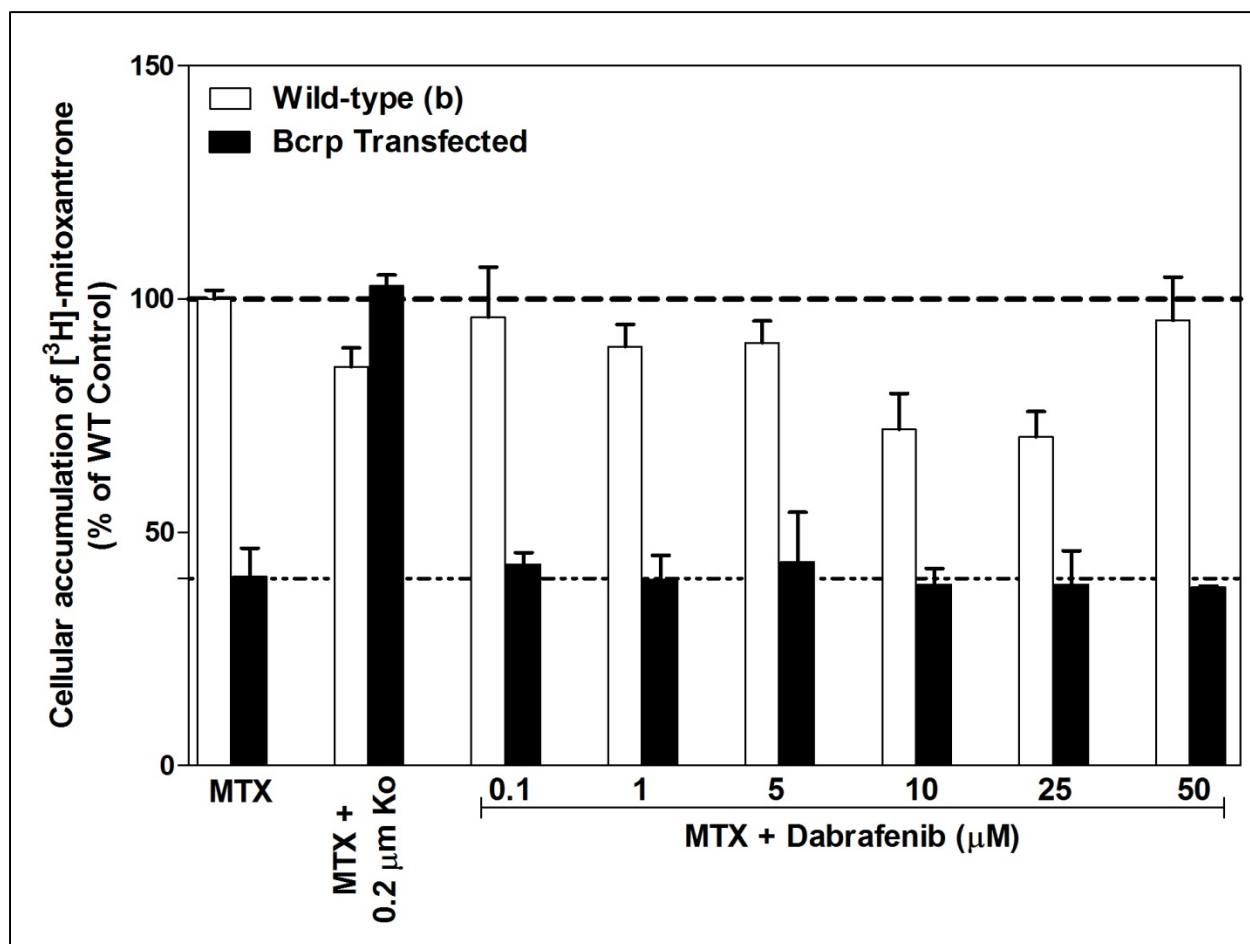

**Figure Legend:** Intracellular accumulation of [<sup>3</sup>H]-mitoxantrone (MTX; Bcrp probe substrate) in Bcrp1-transfected cell lines with increasing concentrations of dabrafenib from 0.1 μM to 50 μM. Ko: Bcrp inhibitor Ko143; Data represent mean ± SD; n = 3 for all data points.
