# Supplementary material
Source: PubMed Central journal article supplement (PMC3583506)
Supplement: supp_112.201475_JPET201475_fig_3.pdf [file supp_112.201475_JPET201475_fig_3.pdf]

## Mechanisms Limiting Distribution of the BRAF<sup>V600E</sup> Inhibitor Dabrafenib to the Brain: Implications for the Treatment of Melanoma Brain Metastases

Rajendar K Mittapalli, Shruthi Vaidhyanathan, Arkadiusz Z. Dudek, and William F. Elmquist

Journal of Pharmacology and Experimental Therapeutics

### Supplemental Figure 3:

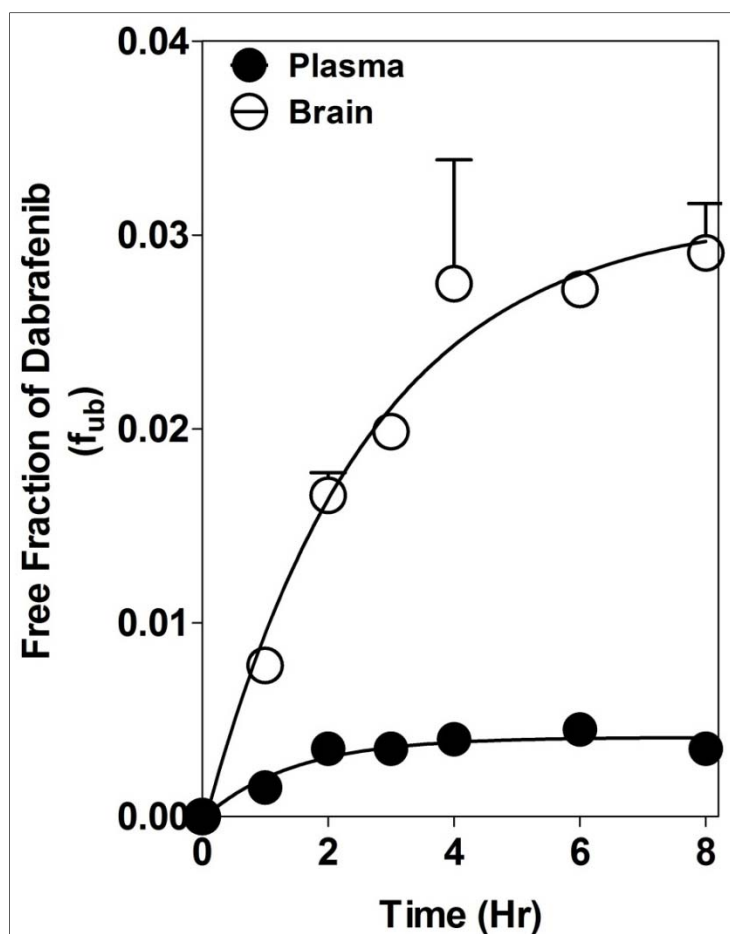

**Figure Legend:** Equilibrium dialysis in plasma and brain homogenate: The graph shows the free fraction of dabrafenib (fraction unbound,  $f_{ub}$ ) in plasma and brain homogenate with respect to time. The data indicate that equilibrium is achieved in ~6hrs in both plasma and brain homogenate.

**JPET#201475**
